# Supplementary material for: Putative synaptic genes defined from a Drosophila whole body developmental transcriptome by a machine learning approach
Source: PubMed Central journal article supplement (PMC4570697; doi:10.1186/s12864-015-1888-3), 2015-09-15
Supplement: 12864_2015_1888_MOESM3_ESM.pdf [file 12864_2015_1888_MOESM3_ESM.pdf]

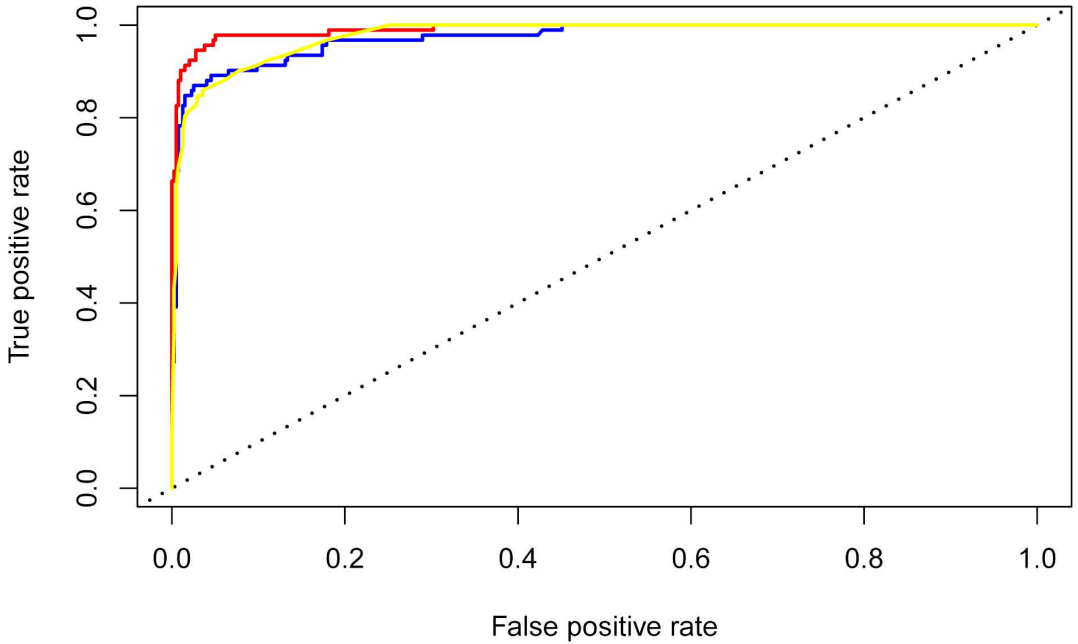

Area under the ROC curve

|                                        |                                        |                                           |
|----------------------------------------|----------------------------------------|-------------------------------------------|
| <span style="color: blue;">—</span> RF | <span style="color: red;">—</span> SVM | <span style="color: yellow;">—</span> kNN |
| 0.972                                  | 0.991                                  | 0.977                                     |

**Additional file 3 - ROC curves of the three classifiers.**

The graph shows the true positive error rate vs. the false positive rate for each classifier. These rates were calculated in R. The area under the curve is shown under the graph.
