# Supplementary material for: Putative synaptic genes defined from a Drosophila whole body developmental transcriptome by a machine learning approach
Source: PubMed Central journal article supplement (PMC4570697; doi:10.1186/s12864-015-1888-3), 2015-09-15
Supplement: 12864_2015_1888_MOESM4_ESM.pdf [file 12864_2015_1888_MOESM4_ESM.pdf]

Average misclassification error rates

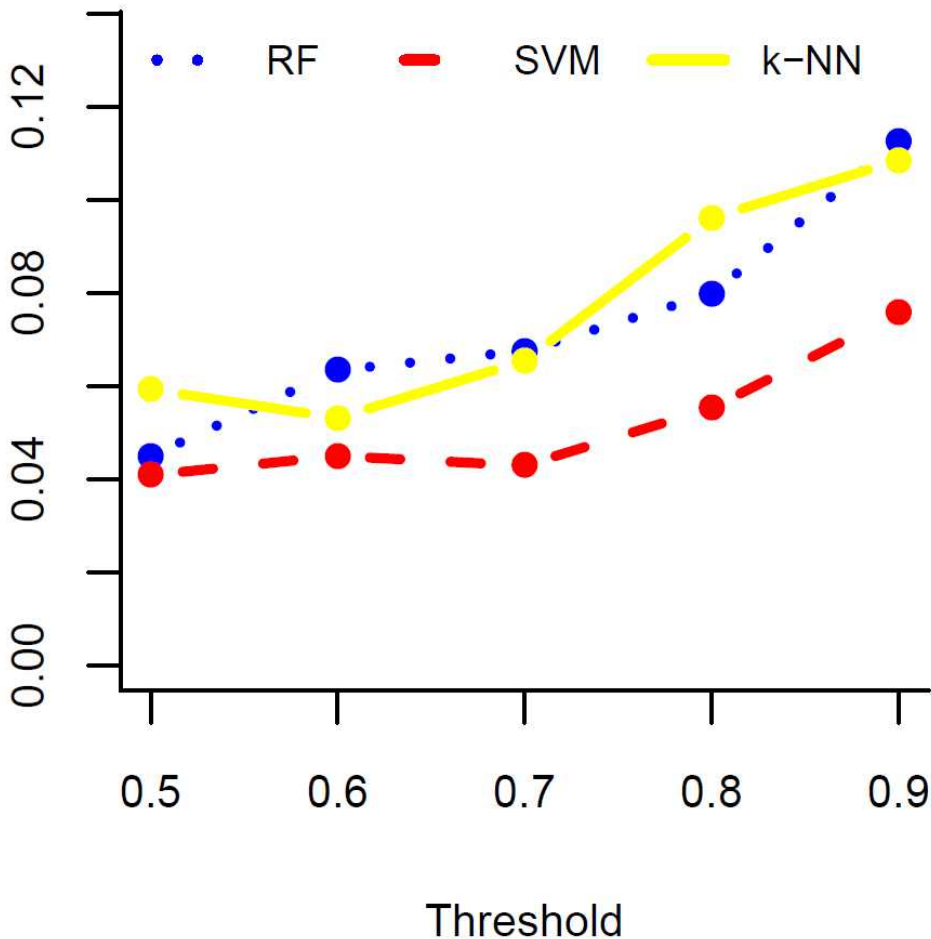

**Additional file 4 - Misclassification error rates as the classification threshold increases.** Average misclassification error rates were calculated, by ten fold cross validation, for each classifier and each classification threshold.
